# Supplementary material for: Twenty Years of Ferroportin Disease: A Review or An Update of Published Clinical, Biochemical, Molecular, and Functional Features
Source: PubMed Central journal article supplement (PMC6789780; doi:10.3390/ph12030132), 2019-09-09
Supplement: pharmaceuticals-12-00132-s001.pdf [file pharmaceuticals-12-00132-s001.pdf]

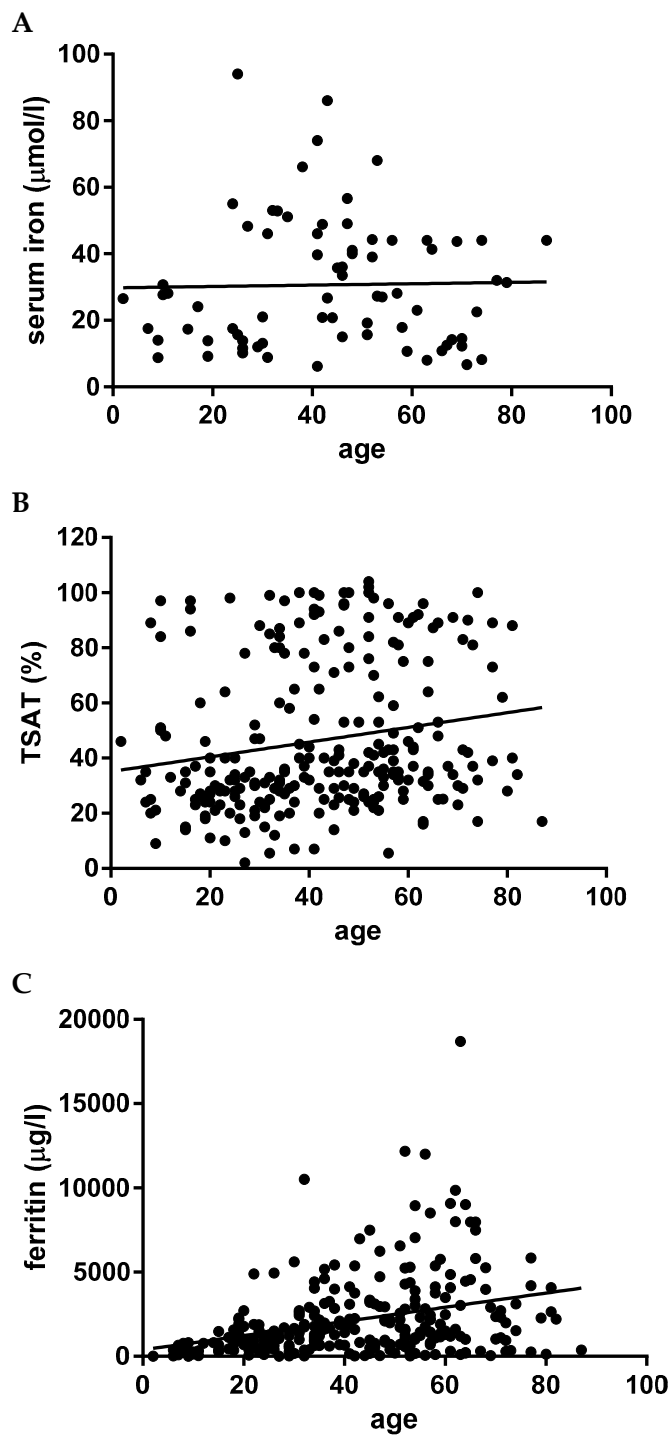

**Figure 1S.** Relation between age and (A) serum iron ( $r = 0.021$ ,  $p = \text{ns}$ ), (B) TSAT ( $r = 0.058$ ,  $p = 0.003$ ) and (C) serum ferritin ( $r = 0.327$ ,  $p < 0.0001$ ) in patients with reported ferroportin variants.

**Table 1S.** Phenotypical features by gender.

|                                | <b>Female (n=123)</b> | <b>Male (n=195)</b> | <i>p</i> |
|--------------------------------|-----------------------|---------------------|----------|
| <b>Age (years)</b>             | n=112                 | n=184               |          |
| <b>median (range)</b>          | 36 (2-80)             | 44 (6-87)           | ns       |
| <b>Hb (g/dl)</b>               | n=52                  | n=79                |          |
| <b>median (range)</b>          | 13.1 (7.5-15.6)       | 15.0 (9.5-18.4)     | 0.01     |
| <b>MCV (fl)</b>                | n=30                  | n=22                |          |
| <b>median (range)</b>          | 91 (77-107)           | 91 (73-108)         | ns       |
| <b>Serum iron (μmol/l)</b>     | n=28                  | n=44                |          |
| <b>median (range)</b>          | 20.9 (6.7-94.0)       | 29.4 (6.2-86.0)     | ns       |
| <b>TSAT (%)</b>                | n=108                 | n=165               |          |
| <b>median (range)</b>          | 31 (2-100)            | 40 (7-104)          | 0.0003   |
| <b>Ferritin (μg/l)</b>         | n=114                 | n=186               |          |
| <b>median (range)</b>          | 1011 (4-8943)         | 1452 (12-18695)     | 0.004    |
| <b>Iron Removed (g)</b>        | n=11                  | n=36                |          |
| <b>median (range)</b>          | 6.0 (3.2-24.4)        | 10.5 (1.6-80.0)     | ns       |
| <b>Tolerance to Phlebotomy</b> |                       |                     |          |
| <b>Good</b>                    | 17                    | 41                  |          |
| <b>Poor</b>                    | 7                     | 10                  | ns       |
| <b>ALT (IU/L)</b>              | n=26                  | n=27                |          |
| <b>median (range)</b>          | 22 (11-539)           | 52 (11-219)         | ns       |
| <b>HIC (μg/g dry weight)</b>   | n=23                  | n=49                |          |
| <b>median (range)</b>          | 9542 (1083-36270)     | 10881 (307-58590)   | ns       |
| <b>Fibrosis (n)</b>            | 8                     | 42                  |          |
| <b>No fibrosis (n)</b>         | 11                    | 24                  | ns       |
| <b>Alcohol consumption</b>     |                       |                     |          |
| <b>Yes (n)</b>                 | 7                     | 21                  |          |
| <b>No (n)</b>                  | 17                    | 38                  | ns       |

HIC: Hepatic Iron Content

**Table 2S.** Characteristics and iron parameters of probands versus probands' relatives.

|                            | <b>Probands (n=66)</b> | <b>Relatives of probands (n=186)</b> | <b><i>p</i></b> |
|----------------------------|------------------------|--------------------------------------|-----------------|
| <b>Age (years)</b>         | n=64                   | n=168                                |                 |
| <b>median (range)</b>      | 45 (9-71)              | 34 (2-87)                            | 0.01            |
| <b>Gender (n)</b>          |                        |                                      |                 |
| <b>female</b>              | 25                     | 76                                   |                 |
| <b>male</b>                | 40                     | 109                                  | 0.007           |
| <b>Hb (g/dl)</b>           | n=34                   | n=60                                 |                 |
| <b>median (range)</b>      | 14.3 (7.5-16.6)        | 14.1 (11.1-18.4)                     | ns              |
| <b>Serum iron (μmol/l)</b> | n=19                   | n=41                                 |                 |
| <b>median (range)</b>      | 27.0 (8-94)            | 26.5 (8.2-74)                        | ns              |
| <b>TSAT (%)</b>            | n=59                   | n=156                                |                 |
| <b>median (range)</b>      | 36 (5-100)             | 35 (2-104)                           | ns              |
| <b>Ferritin (μg/l)</b>     | n=63                   | n=173                                |                 |
| <b>median (range)</b>      | 1896 (65.1-12000)      | 932 (4-10510)                        | 0.00002         |

HIC: Hepatic Iron Content

**Table 3S.** Phenotypical features by the reported presence of hereditary HFE and non-HFE iron overload conditions.

|                              | <b>Abnormalities (n=53)</b> | <b>No abnormalities (n=113)</b> | <i>p</i> |
|------------------------------|-----------------------------|---------------------------------|----------|
| <b>Age (years)</b>           | n=45                        | n=110                           |          |
| <b>median (range)</b>        | 32 (10-87)                  | 41 (2-82)                       | ns       |
| <b>Gender</b>                |                             |                                 |          |
| <b>Female</b>                | 21                          | 38                              |          |
| <b>Male</b>                  | 24                          | 74                              | ns       |
| <b>Hb (g/dl)</b>             | n=20                        | n=52                            |          |
| <b>median (range)</b>        | 14 (10.1-16.1)              | 14.8 (7.5-16.7)                 | ns       |
| <b>Serum iron (μmol/l)</b>   | n=26                        | n=43                            |          |
| <b>median (range)</b>        | 27.4 (6.7-94)               | 32 (6.2-86)                     | ns       |
| <b>TSAT (%)</b>              | n=47                        | n=103                           |          |
| <b>median (range)</b>        | 40 (2-99)                   | 43 (5.6-104)                    | ns       |
| <b>Ferritin (μg/l)</b>       | n=53                        | n=100                           |          |
| <b>median (range)</b>        | 1150 (4-14829)              | 1597 (12-12000)                 | ns       |
| <b>HIC (μg/g dry weight)</b> | n=19                        | n=31                            |          |
| <b>median (range)</b>        | 10044 (1083-45477)          | 13950 (999-58590)               | ns       |

HIC: Hepatic Iron Content

**Table 4S.** Phenotypical features by the reported current use of alcohol.

|                              | <b>Yes (n=28)</b>  | <b>No (n=56)</b>   | <i>p</i> |
|------------------------------|--------------------|--------------------|----------|
| <b>Age (years)</b>           | n=28               | n=55               |          |
| <b>median (range)</b>        | 40.5 (19-72)       | 43 (6-79)          | ns       |
| <b>Gender</b>                |                    |                    |          |
| <b>Female</b>                | 7                  | 17                 |          |
| <b>Male</b>                  | 21                 | 38                 | ns       |
| <b>Hb (g/dl)</b>             | n=24               | n=42               |          |
| <b>median (range)</b>        | 14.9 (11-16.6)     | 14.1 (7.5-18.4)    | ns       |
| <b>Serum iron (µmol/l)</b>   | n=3                | n=15               |          |
| <b>median (range)</b>        | 48.9 (19,2-53)     | 33.5 (10.7-86)     | ns       |
| <b>TSAT (%)</b>              | n=28               | n=48               |          |
| <b>median (range)</b>        | 35 (10-100)        | 40.5 (14-100)      | ns       |
| <b>Ferritin (µg/l)</b>       | n=28               | n=56               |          |
| <b>median (range)</b>        | 2101 (71-10510)    | 1586 (142-12178)   | ns       |
| <b>HIC (µg/g dry weight)</b> | n=6                | n=32               |          |
| <b>median (range)</b>        | 14816 (8750-21929) | 10331 (3350-58590) | ns       |

HIC: Hepatic Iron Content

**Table 5S.** Phenotypical features of patients with functional GOF ferroportin variants by hepcidin sensitivity.

|                                                  | <b>GOF hepcidin resistant<br/>(n=32)</b> | <b>GOF hepcidin sensitive<br/>(n=10)</b> | <b>p</b> |
|--------------------------------------------------|------------------------------------------|------------------------------------------|----------|
| <b>Age (years)</b>                               | n=30                                     | n=9                                      |          |
| <b>median (range)</b>                            | 39.3 (2-77)                              | 57 (37-72)                               | 0.007    |
| <b>Gender (n)</b>                                |                                          |                                          |          |
| <b>Female</b>                                    | 14                                       | 2                                        |          |
| <b>Male</b>                                      | 18                                       | 8                                        | ns       |
| <b>Serum Iron (<math>\mu\text{mol/l}</math>)</b> | n=20                                     | n=2                                      |          |
| <b>median (range)</b>                            | 44.0 (8.8-74)                            | 38.5 (28.1-49)                           | ns       |
| <b>TSAT (%)</b>                                  | n=31                                     | n=9                                      |          |
| <b>median (range)</b>                            | 92 (9-104)                               | 42 (30-100)                              | 0.0004   |
| <b>Ferritin (<math>\mu\text{g/l}</math>)</b>     | n=24                                     | n=10                                     |          |
| <b>median (range)</b>                            | 540 (12-3751)                            | 980 (585-2960)                           | ns       |
| <b>Response to phlebotomy<br/>(n)</b>            |                                          |                                          |          |
| <b>Good</b>                                      | 10                                       | 1                                        |          |
| <b>Poor</b>                                      | 0                                        | 1                                        | ns       |

**Table 6S.** Phenotypical features of patients with functional LOF ferroportin variant by hepcidin sensitivity.

|                                   | <b>LOF hepcidin resistant<br/>(n=68)</b> | <b>LOF hepcidin sensitive<br/>(n=57)</b> | <i>p</i> |
|-----------------------------------|------------------------------------------|------------------------------------------|----------|
| <b>Age (years)</b>                | n=67                                     | n=53                                     |          |
| <b>median (range)</b>             | 32 (6-74)                                | 38 (6-87)                                | ns       |
| <b>Gender (n)</b>                 |                                          |                                          |          |
| <b>Female</b>                     | 31                                       | 19                                       |          |
| <b>Male</b>                       | 35                                       | 34                                       | ns       |
| <b>Serum Iron (µmol/l)</b>        | n=21                                     | n=14                                     |          |
| <b>median (range)</b>             | 14.0 (8.2-46)                            | 28.7 (6.2-94)                            | 0.01     |
| <b>TSAT (%)</b>                   | n=57                                     | n=38                                     |          |
| <b>median (range)</b>             | 28 (10-81)                               | 35 (7-99)                                | 0.0005   |
| <b>Ferritin (µg/l)</b>            | n=68                                     | n=53                                     |          |
| <b>median (range)</b>             | 1853 (24-18695)                          | 1066 (24-21665)                          | ns       |
| <b>Response to phlebotomy (n)</b> |                                          |                                          |          |
| <b>Good</b>                       | 17                                       | 2                                        |          |
| <b>Poor</b>                       | 8                                        | 4                                        | ns       |

**Table 7S.** Phenotypical features by hepcidin sensitive GOF and LOF ferroportin variants.

|                                   | <b>GOF hepcidin sensitive<br/>(n=10)</b> | <b>LOF hepcidin sensitive<br/>(n=57)</b> | <i>p</i> |
|-----------------------------------|------------------------------------------|------------------------------------------|----------|
| <b>Age (years)</b>                | n=9                                      | n=53                                     |          |
| <b>median (range)</b>             | 57 (37-72)                               | 38 (6-87)                                | 0.02     |
| <b>Gender (n)</b>                 |                                          |                                          |          |
| <b>Female</b>                     | 2                                        | 19                                       |          |
| <b>Male</b>                       | 8                                        | 34                                       | ns       |
| <b>Serum Iron (µmol/l)</b>        | n=2                                      | n=14                                     |          |
| <b>median (range)</b>             | 38.5 (28.1-49.0)                         | 28.7 (6.2-94)                            | ns       |
| <b>TSAT (%)</b>                   | n=9                                      | n=38                                     |          |
| <b>median (range)</b>             | 42 (30-100)                              | 35 (7-99)                                | ns       |
| <b>Ferritin (µg/l)</b>            | n=10                                     | n=53                                     |          |
| <b>median (range)</b>             | 980 (585-2960)                           | 1066 (24-21665)                          | ns       |
| <b>Response to phlebotomy (n)</b> |                                          |                                          |          |
| <b>Good</b>                       | 1                                        | 2                                        |          |
| <b>Poor</b>                       | 1                                        | 4                                        | ns       |



**Table 8S.** Phenotypical features by hepcidin resistant GOF and LOF ferroportin variants.

|                                   | <b>GOF hepcidin resistant<br/>(n=32)</b> | <b>LOF hepcidin resistant<br/>(n=68)</b> | <i>p</i> |
|-----------------------------------|------------------------------------------|------------------------------------------|----------|
| <b>Age (years)</b>                | n=30                                     | n=67                                     |          |
| <b>median (range)</b>             | 39.5 (2-77)                              | 32 (6-74)                                | ns       |
| <b>Gender (n)</b>                 |                                          |                                          |          |
| <b>Female</b>                     | 14                                       | 31                                       |          |
| <b>Male</b>                       | 18                                       | 35                                       | ns       |
| <b>Serum Iron (µmol/l)</b>        | n=20                                     | n=21                                     |          |
| <b>median (range)</b>             | 44.0 (8.8-74.0)                          | 14 (8.2-46.0)                            | 0.00002  |
| <b>TSAT (%)</b>                   | n=31                                     | n=57                                     |          |
| <b>median (range)</b>             | 92 (9-104)                               | 28 (10-81)                               | <0.00001 |
| <b>Ferritin (µg/l)</b>            | n=24                                     | n=68                                     |          |
| <b>median (range)</b>             | 540 (12-3751)                            | 1853 (24-18695)                          | 0.003    |
| <b>Iron distribution</b>          |                                          |                                          |          |
| <b>Macrophage</b>                 | 0                                        | 9                                        |          |
| <b>Hepatocyte</b>                 | 5                                        | 0                                        | 0.0005   |
| <b>Response to phlebotomy (n)</b> |                                          |                                          |          |
| <b>Good</b>                       | 10                                       | 17                                       |          |
| <b>Poor</b>                       | 0                                        | 5                                        | ns       |
